# Supplementary material for: A Hot Water Extract of Curcuma longa L. Improves Fasting Serum Glucose Levels in Participants with Low-Grade Inflammation: Reanalysis of Data from Two Randomized, Double-Blind, Placebo-Controlled Trials
Source: MDPI journal article supplement (doi:10.3390/nu14183763), 2022-09-13
Supplement: s1 [file s1]

**Supplementary Table S1. Baseline characteristics of the participants in study 1 <sup>1</sup>.**

|                                 | Placebo<br>(n = 44) |       | <i>C. longa</i> Extract<br>(n = 43) |       | Total<br>(n = 87) |       |
|---------------------------------|---------------------|-------|-------------------------------------|-------|-------------------|-------|
|                                 | Mean                | SD    | Mean                                | SD    | Mean              | SD    |
| Sex, male/female, n             | 22/22               |       | 23/20                               |       | 45/42             |       |
| Age, y                          | 58.5                | 5.5   | 58.8                                | 5.3   | 58.6              | 5.4   |
| Physical measurements and tests |                     |       |                                     |       |                   |       |
| Height, cm                      | 162.1               | 8.1   | 162.8                               | 8.3   | 162.4             | 8.2   |
| Body weight, kg                 | 66.4                | 9.4   | 66.5                                | 7.8   | 66.4              | 8.6   |
| BMI, kg/m <sup>2</sup>          | 25.1                | 2.5   | 25.0                                | 1.8   | 25.1              | 2.2   |
| SBP, mmHg                       | 131.0               | 16.8  | 129.2                               | 15.3  | 130.1             | 16.1  |
| DBP, mmHg                       | 82.4                | 11.6  | 81.6                                | 10.5  | 81.9              | 11.0  |
| Serum inflammatory markers      |                     |       |                                     |       |                   |       |
| hsCRP, mg/dL                    | 0.105               | 0.081 | 0.090                               | 0.064 | 0.098             | 0.073 |
| Metabolic markers               |                     |       |                                     |       |                   |       |
| Glucose, mg/dL                  | 84.2                | 6.0   | 86.0                                | 6.9   | 85.1              | 6.5   |
| HbA1c, %                        | 5.48                | 0.24  | 5.51                                | 0.28  | 5.49              | 0.26  |
| Triglyceride, mg/dL             | 112.5               | 56.2  | 127.5                               | 74.1  | 120.3             | 66.2  |
| Total cholesterol, mg/dL        | 220.1               | 38.6  | 218.3                               | 33.5  | 219.0             | 36.1  |
| LDL-cholesterol, mg/dL          | 138.1               | 34.2  | 132.8                               | 29.9  | 135.1             | 32.0  |
| HDL-cholesterol, mg/dL          | 54.3                | 14.9  | 56.0                                | 12.3  | 55.1              | 13.6  |

BMI, body mass index; *C. longa*, *Curcuma longa* L.; DBP, diastolic blood pressure; HbA1c, hemoglobin A1c; HDL, high-density lipoprotein, hsCRP, high-sensitivity C-reactive protein; LDL, low-density lipoprotein; SBP, systolic blood pressure. <sup>1</sup> Values represent the means and standard deviations for n = 44 (placebo group) or n = 43 (*C. longa* extract group) in study 1. Results in men and women were compared with the two-tailed Mann Whitney *U* test, and physical measurements and tests, serum inflammatory markers, and metabolic markers were compared with the two-tailed unpaired Student's *t* test when variance was homogeneous or the Aspin-Welch *t* test when variance was heterogeneous.

**Supplementary Table S2. Baseline characteristics of the participants in study 2 <sup>1</sup>.**

|                                 | Placebo<br>(n = 40) |       | <i>C. longa</i> Extract<br>(n = 39) |       | Total<br>(n = 79) |       |
|---------------------------------|---------------------|-------|-------------------------------------|-------|-------------------|-------|
|                                 | Mean                | SD    | Mean                                | SD    | Mean              | SD    |
| Sex, male/female, n             | 16/24               |       | 15/24                               |       | 31/48             |       |
| Age, y                          | 56.6                | 4.3   | 56.7                                | 5.0   | 56.7              | 4.6   |
| Physical measurements and tests |                     |       |                                     |       |                   |       |
| Height, cm                      | 162.5               | 8.5   | 162.5                               | 8.5   | 162.5             | 8.4   |
| Body weight, kg                 | 69.9                | 8.0   | 70.3                                | 7.8   | 70.1              | 7.8   |
| BMI, kg/m <sup>2</sup>          | 26.4                | 1.8   | 26.6                                | 1.5   | 26.5              | 1.6   |
| SBP, mmHg                       | 122.9               | 12.8  | 119.7                               | 14.7  | 121.3             | 13.8  |
| DBP, mmHg                       | 77.6                | 10.2  | 77.6                                | 9.6   | 77.6              | 9.8   |
| Serum inflammatory markers      |                     |       |                                     |       |                   |       |
| hsCRP, mg/dL                    | 0.076               | 0.047 | 0.075                               | 0.064 | 0.075             | 0.056 |
| Metabolic markers               |                     |       |                                     |       |                   |       |
| Glucose, mg/dL                  | 92.3                | 8.7   | 88.5*                               | 6.4   | 90.4              | 7.9   |
| HbA1c, %                        | 5.63                | 0.20  | 5.55                                | 0.26  | 5.59              | 0.23  |
| Triglyceride, mg/dL             | 120.8               | 52.9  | 122.2                               | 67.0  | 121.5             | 59.9  |
| Total cholesterol, mg/dL        | 231.4               | 36.8  | 221.2                               | 37.5  | 226.3             | 37.3  |
| LDL-cholesterol, mg/dL          | 148.7               | 31.9  | 138.2                               | 31.9  | 143.5             | 32.1  |
| HDL-cholesterol, mg/dL          | 58.2                | 11.9  | 58.2                                | 16.6  | 58.2              | 14.3  |

BMI, body mass index; *C. longa*, Curcuma longa L.; DBP, diastolic blood pressure; HbA1c, hemoglobin A1c; HDL, high-density lipoprotein; hsCRP, high-sensitivity C-reactive protein; LDL, low-density lipoprotein; SBP, systolic blood pressure. 1 Values represent the means and standard deviations for n = 40 (placebo group) or n = 39 (*C. longa* extract group) in study 2. \*  $p < 0.05$  vs placebo group. Results in men and women were compared with the two-tailed Mann Whitney U test, and physical measurements and tests, serum inflammatory markers, and metabolic markers were compared with the two-tailed unpaired Student's t test when variance was homogeneous or the Aspin-Welch t test when variance was heterogeneous.
